# Supplementary material for: Engineering yolk–shell MnFe@CeOx@TiOx nanocages as a highly efficient catalyst for selective catalytic reduction of NO with NH3 at low temperatures
Source: Royal Society of Chemistry journal article supplement (doi:10.1039/d2nr02255a), 2022-01-01
Supplement: d2nr02255a1.pdf [file d2nr02255a1.pdf]

## Supporting Information

# Engineering yolk-shell MnFe@CeO<sub>x</sub>@TiO<sub>x</sub> nanocages as a highly efficient catalyst for selective catalytic reduction of NO with NH<sub>3</sub> at low temperature

Ziguo Cai<sup>a, b</sup>, Guodong Zhang<sup>a</sup>, Zhicheng Tang<sup>a, c\*</sup>, Jiyi Zhang<sup>b\*</sup>

*(<sup>a</sup> State Key Laboratory for Oxo Synthesis and Selective Oxidation, and National Engineering Research Center for Fine Petrochemical Intermediates, Lanzhou Institute of Chemical Physics, Chinese Academy of Sciences, Lanzhou, 730000, China.*

*<sup>b</sup> School of Petroleum and Chemical, Lanzhou University of Technology, Lanzhou 730050, China.*

*<sup>c</sup> Yantai Zhongke Research Institute of Advanced Materials and Green Chemical Engineering, Shandong Laboratory of Yantai Advanced Materials and Green Manufacturing, Yantai, 264006, China)*

---

\*Corresponding author.

E-mail address: [tangzhicheng@licp.cas.cn](mailto:tangzhicheng@licp.cas.cn) (Z. Tang), [zhangjiyi@lut.edu.cn](mailto:zhangjiyi@lut.edu.cn) (J. Zhang)

**Table S1** The number of acid sites on the surface of MnFeO<sub>x</sub>, MnFe@TiO<sub>x</sub>, MnFe@CeO<sub>x</sub>, MnFe@CeO<sub>x</sub>@TiO<sub>x</sub>-20, MnFe@CeO<sub>x</sub>@TiO<sub>x</sub>-40 and MnFe@CeO<sub>x</sub>@TiO<sub>x</sub>-90.

| Samples                                     | Weak acid | Medium acid | Strong acid | Total acid |
|---------------------------------------------|-----------|-------------|-------------|------------|
|                                             | peak area | peak area   | peak area   | peak area  |
| MnFeO <sub>x</sub>                          | 83.4      | 88.1        | -           | 171.5      |
| MnFe@TiO <sub>x</sub>                       | 72.1      | 163.2       | 29.7        | 265.0      |
| MnFe@CeO <sub>x</sub>                       | 45.6      | 94.4        | 5.7         | 145.7      |
| MnFe@CeO <sub>x</sub> @TiO <sub>x</sub> -20 | 89.2      | 189.0       | 40.1        | 318.3      |
| MnFe@CeO <sub>x</sub> @TiO <sub>x</sub> -40 | 62.3      | 118.0       | 74.0        | 254.3      |
| MnFe@CeO <sub>x</sub> @TiO <sub>x</sub> -90 | 89.5      | 74.0        | 43.8        | 207.3      |

**Table S2** MnFe@CeO<sub>x</sub>@TiO<sub>x</sub>-40 fresh and after enduring H<sub>2</sub>O test at 160 °C catalyst

surface element content and Mn 2p, Fe 2p, Ce 3d, and O1s spectra fitting result.

| Sample | Surface composition (at.%) |     |     |      |      | Mn <sup>4+</sup> /Mn <sub>total</sub> | Fe <sup>3+</sup> /Fe <sub>total</sub> | Ce <sup>3+</sup> /Ce <sub>total</sub> | O <sub>ads</sub> /O <sub>total</sub> | O <sub>sur</sub> /O <sub>total</sub> |
|--------|----------------------------|-----|-----|------|------|---------------------------------------|---------------------------------------|---------------------------------------|--------------------------------------|--------------------------------------|
|        | Mn                         | Fe  | Ce  | O    | Ti   | (%)                                   | (%)                                   | (%)                                   | (%)                                  | (%)                                  |
| Fresh  | 2.4                        | 4.0 | 2.2 | 70.9 | 20.5 | 43.5                                  | 68.8                                  | 22.5                                  | 61.2                                 | 20.9                                 |
| 160°C  | 3.4                        | 3.3 | 2.7 | 72.1 | 18.5 | 34.6                                  | 63.9                                  | 18.0                                  | 47.5                                 | 28.4                                 |

We prepared MnFe@TiO<sub>x</sub>-40@CeO<sub>x</sub> catalyst sample. Take 0.20 g of the previously prepared precursor Mn<sub>3</sub>[Fe(CN)<sub>6</sub>]<sub>2</sub> • nH<sub>2</sub>O nanocubes and disperse them in 40 ml of absolute ethanol by ultrasonic (30 min). After stirring for 30 min, 5 ml of deionized water was added dropwise and recorded as solution A. Dissolve 0.50 g of butyl titanate in 20 ml of absolute ethanol and call it solution B. Then, under vigorous stirring, the B solution was slowly dropped into the A solution. After aging in a 25 °C water bath for 2 h, the product was collected by centrifugation. After washing with absolute ethanol for 3 times, the obtained product was dried at 80 °C for 12 h to obtain MnFe@TiO<sub>x</sub>-40 precursor. Take 0.10 g of the previously prepared precursor MnFe@TiO<sub>x</sub>-40 and disperse it in a mixed solution of 40 ml of absolute ethanol and 40 ml of deionized water. Under magnetic stirring, 0.30 g of Ce(NO<sub>3</sub>) • 6H<sub>2</sub>O and 0.40 g of C<sub>6</sub>H<sub>12</sub>N<sub>4</sub> were added to the above solution in turn. Heat further to 70 °C in a water bath and maintain reflux for 2 h. After naturally cooling to room temperature, the product was collected by centrifugation and washed twice with deionized water. The obtained product was dried at 60 °C for 12 h and calcined at 400 °C for 3 h (the heating rate was 1 °C/min) to obtain the MnFe@TiO<sub>x</sub>-40@CeO<sub>x</sub> catalyst.

We prepared CeO<sub>x</sub>@TiO<sub>x</sub>-40 catalyst. Under magnetic stirring, 0.30 g of Ce(NO<sub>3</sub>) • 6H<sub>2</sub>O and 0.40 g of C<sub>6</sub>H<sub>12</sub>N<sub>4</sub> were dispersed in a mixed solution of 40 ml of absolute ethanol and 40 ml of deionized water. Stir in a water bath at 70 °C for 2 h, a CeO<sub>x</sub> precursor is obtained. Take 0.20 g CeO<sub>x</sub> precursor ultrasonically (30min) and disperse it in 40 ml absolute ethanol, after stirring for 30min, add 5ml deionized water dropwise and record as solution A. Dissolve 0.50 g of butyl titanate in 20 ml of

absolute ethanol and call it solution B. Then, under vigorous stirring, the B solution was slowly dropped into the A solution. After aging in a 25 °C water bath for 2 h, the product was collected by centrifugation. After washing three times with absolute ethanol, the obtained product was dried at 80 °C for 12 h, and calcined at 400 °C for 3 h (the heating rate was 1 °C/min) to obtain the CeO<sub>x</sub>@TiO<sub>x</sub>-40 catalyst.

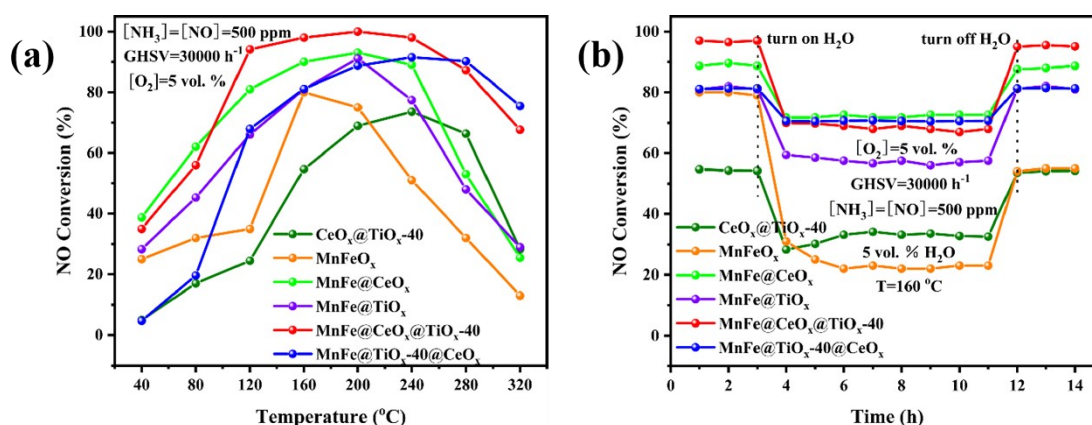

**Fig. S1.** NO conversion rate of the catalysts under  $\text{GHSV}=30,000 \text{ h}^{-1}$  (a, b). H<sub>2</sub>O-resistance and stability test of the catalysts (c, d). Testing conditions: 500 ppm NH<sub>3</sub>, 500 ppm NO, and 5 vol. % O<sub>2</sub> balanced with N<sub>2</sub> and 5 vol. % H<sub>2</sub>O (when needed).

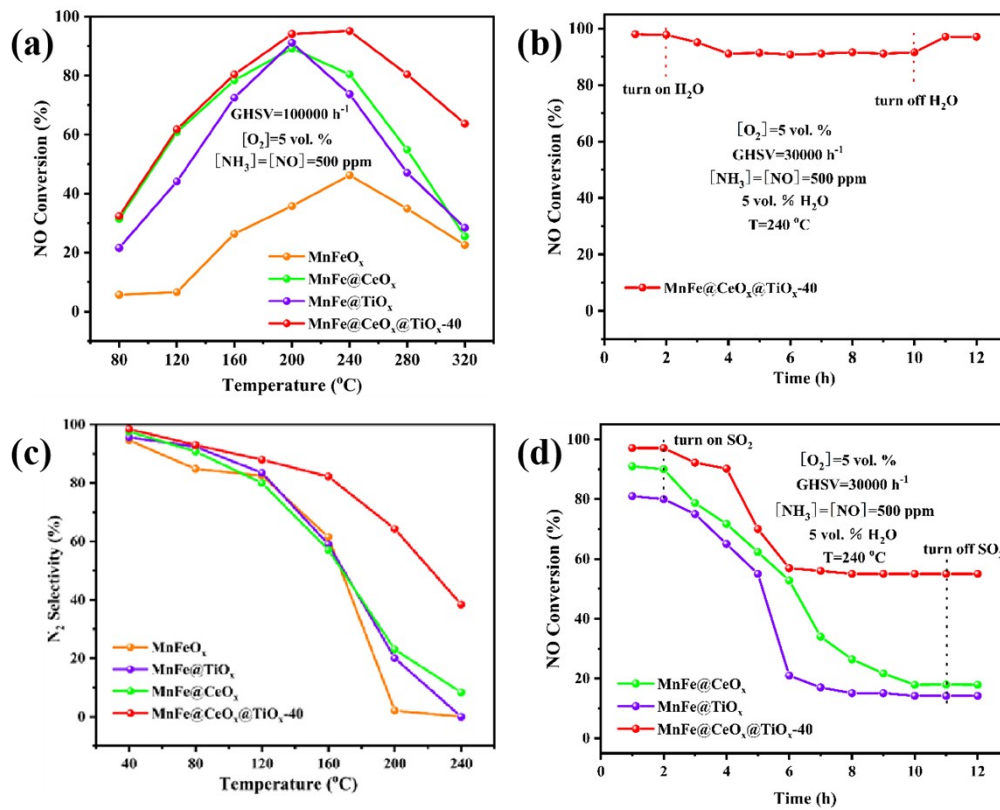

**Fig. S2.** NO conversion rate of the catalysts under GHSV=100000 h<sup>-1</sup> (a). The H<sub>2</sub>O resistance test of MnFe@CeO<sub>x</sub>@TiO<sub>x</sub>-40 catalyst at 240 °C (b), N<sub>2</sub> selectivity of catalysts (c), The SO<sub>2</sub> resistance test of catalysts (d).

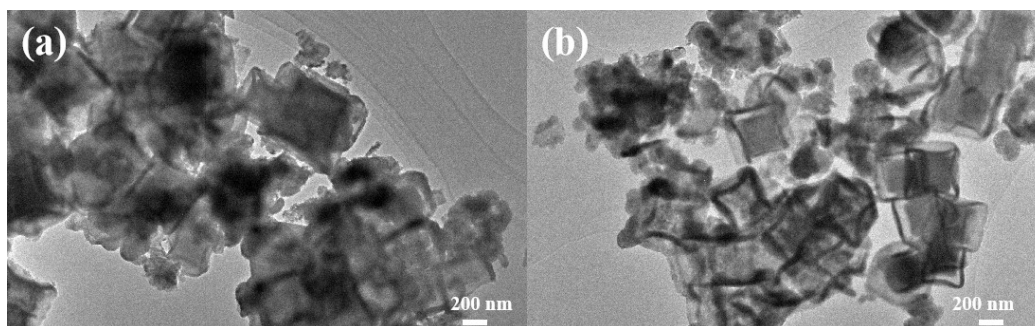

**Fig. S3.** TEM images of the MnFe@TiO<sub>x</sub> catalyst.

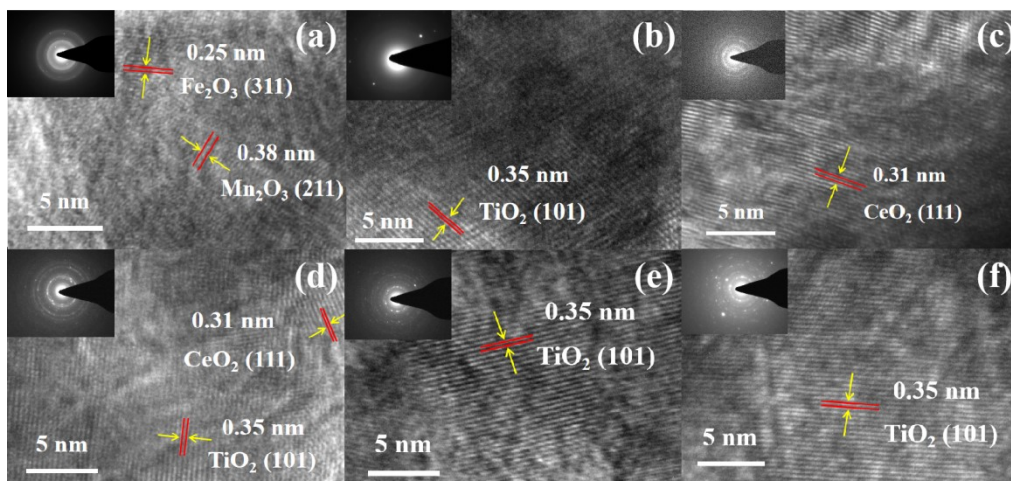

**Fig. S4.** HR-TEM image of the catalysts:  $\text{MnFeO}_x$  (a),  $\text{MnFe@TiO}_x$  (b),  $\text{MnFe@CeO}_x$  (c),  $\text{MnFe@CeO}_x@TiO_x-20$  (d),  $\text{MnFe@CeO}_x@TiO_x-40$  (e),  $\text{MnFe@CeO}_x@TiO_x-90$  (f).



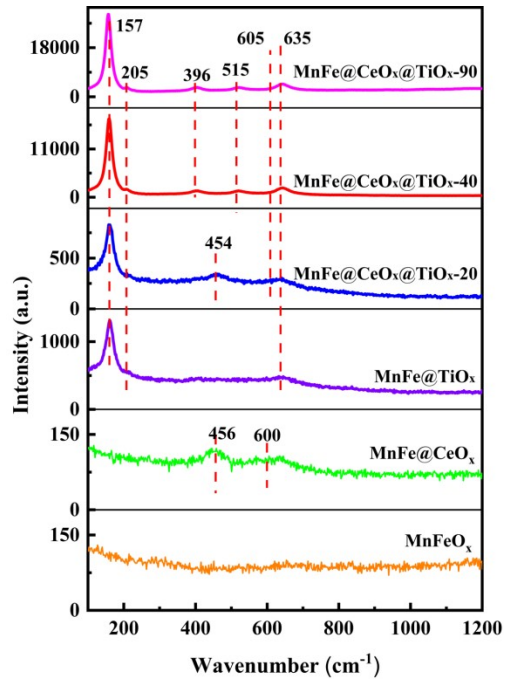

**Fig. S5.** Raman spectra of the catalysts.

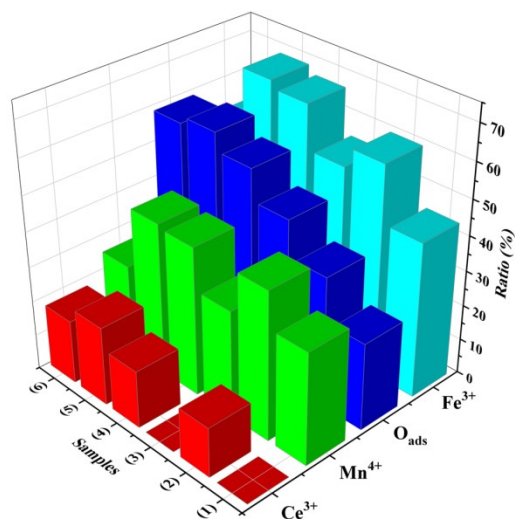

**Fig. S6.** The relative proportion of catalysts active species (MnFeO<sub>x</sub> (1), MnFe@CeO<sub>x</sub> (2), MnFe@TiO<sub>x</sub> (3), MnFe@CeO<sub>x</sub>@TiO<sub>x</sub>-20 (4), MnFe@CeO<sub>x</sub>@TiO<sub>x</sub>-40 (5), MnFe@CeO<sub>x</sub>@TiO<sub>x</sub>-90 (6)).

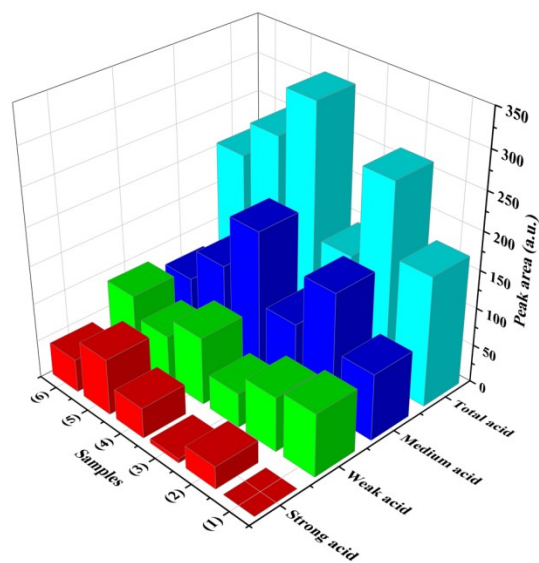

**Fig. S7.** Relative number of catalyst acid sites ( $\text{MnFeO}_x$  (1),  $\text{MnFe@TiO}_x$  (2),  $\text{MnFe@CeO}_x$  (3),  $\text{MnFe@CeO}_x@\text{TiO}_x$ -20 (4),  $\text{MnFe@CeO}_x@\text{TiO}_x$ -40 (5),  $\text{MnFe@CeO}_x@\text{TiO}_x$ -90 (6)).

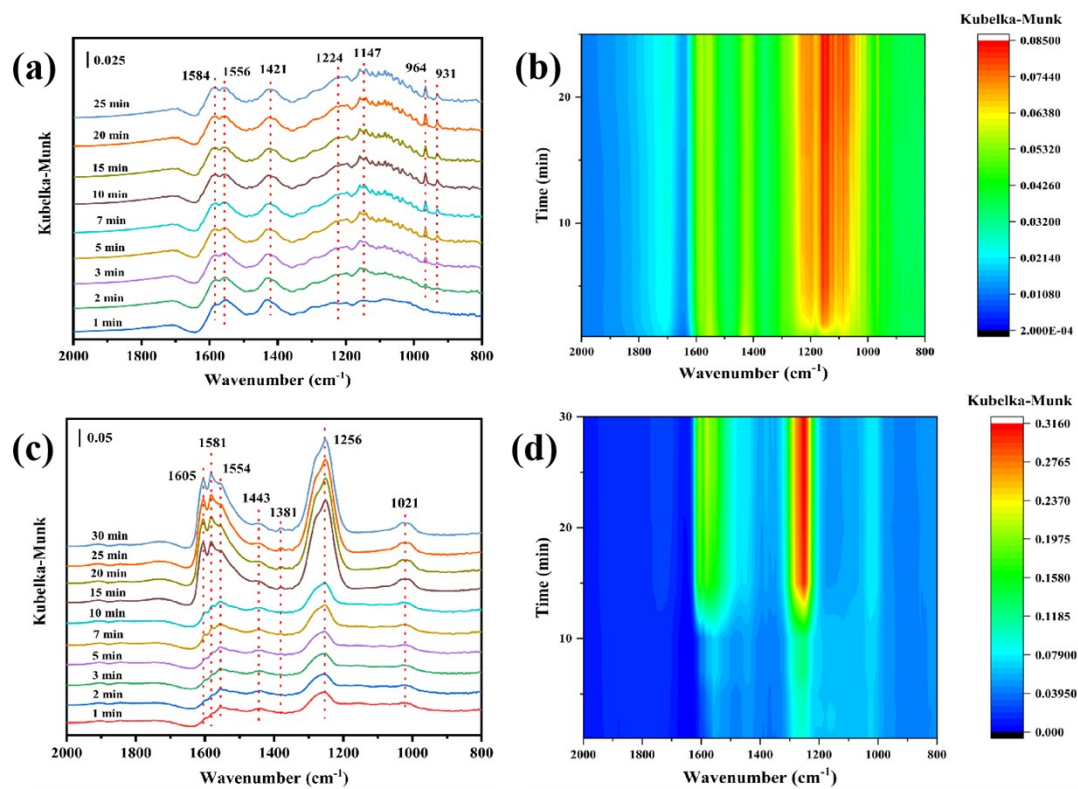

**Fig. S8.** MnFe@CeO<sub>x</sub>@TiO<sub>x</sub>-40 catalyst at 160 °C NH<sub>3</sub> in-situ DRIFT adsorption experiment (a-b) and NO+O<sub>2</sub> in-situ DRIFT adsorption experiment (c-d).
